# Supplementary material for: SHP2 Regulates Chondrocyte Terminal Differentiation, Growth Plate Architecture and Skeletal Cell Fates
Source: PubMed Central journal article supplement (PMC4038465; doi:10.1371/journal.pgen.1004364), 2014-05-29
Supplement: pgen.1004364.s015.pdf [file pgen.1004364.s015.pdf]

| Mouse litter | Genotype & time point                                       | Replicate | Total # reads (50bp paired end) | % mapped |
|--------------|-------------------------------------------------------------|-----------|---------------------------------|----------|
| <b>A</b>     | <b>Day 4</b><br>Wild-type                                   | 1         | 24,958,041                      | 96%      |
|              |                                                             | 2         | 10,908,661                      | 97%      |
|              |                                                             | 3         | 13,805,624                      | 97%      |
|              | <b>Week 1</b><br>Wild-type                                  | 1         | 13,367,197                      | 95%      |
|              |                                                             | 2         | 13,300,200                      | 98%      |
|              |                                                             | 3         | 9,673,123                       | 97%      |
|              | <b>Week 2</b><br>Wild-type                                  | 1         | 13,234,707                      | 96%      |
|              |                                                             | 2         | 9,378,957                       | 96%      |
|              |                                                             | 3         | 10,341,598                      | 98%      |
|              | <b>Week 3</b><br>Wild-type                                  | 1         | 11,077,264                      | 96%      |
|              |                                                             | 2         | 10,969,002                      | 97%      |
|              |                                                             | 3         | 13,946,829                      | 97%      |
| <b>B</b>     | <b>Week 1, 4-OHT</b><br>Wild-type                           | 1         | 16,566,070                      | 96%      |
|              |                                                             | 2         | 17,246,647                      | 96%      |
|              |                                                             | 3         | 16,205,375                      | 96%      |
|              | <b>Week 1, untreated</b><br>Wild-type                       | 1         | 17,057,605                      | 97%      |
|              |                                                             | 2         | 23,336,815                      | 97%      |
|              |                                                             | 3         | 25,856,434                      | 97%      |
|              | <b>Week 3, 4-OHT</b><br>Wild-type                           | 1         | 20,776,870                      | 95%      |
|              |                                                             | 2         | 16,113,528                      | 96%      |
|              |                                                             | 3         | 14,954,606                      | 85%      |
|              | <b>Week 3, untreated</b><br>Wild-type                       | 1         | 15,769,721                      | 97%      |
|              |                                                             | 2         | 14,294,479                      | 95%      |
|              |                                                             | 3         | 20,438,780                      | 97%      |
| <b>C</b>     | <b>Week 1, 4-OHT</b><br><i>Ptpn11 -/fl; CMV-CreERT2</i>     | 1         | 12,110,000                      | 93%      |
|              |                                                             | 2         | 9,657,059                       | 94%      |
|              |                                                             | 3         | 9,507,599                       | 96%      |
|              | <b>Week 1, untreated</b><br><i>Ptpn11 -/fl; CMV-CreERT2</i> | 1         | 25,954,789                      | 95%      |
|              |                                                             | 2         | 12,766,566                      | 97%      |
|              |                                                             | 3         | 7,648,448                       | 86%      |
|              | <b>Week 3, 4-OHT</b><br><i>Ptpn11 -/fl; CMV-CreERT2</i>     | 1         | 31,478,241                      | 97%      |
|              |                                                             | 2         | 40,187,879                      | 96%      |
|              |                                                             | 3         | 31,181,967                      | 96%      |
|              | <b>Week 3, untreated</b><br><i>Ptpn11 -/fl; CMV-CreERT2</i> | 1         | 26,929,091                      | 96%      |
|              |                                                             | 2         | 18,316,729                      | 93%      |
|              |                                                             | 3         | 21,570,699                      | 94%      |
| <b>D</b>     | <b>Week 1</b><br>U0126                                      | 1         | 14,138,829                      | 97%      |
|              |                                                             | 2         | 12,634,668                      | 96%      |
|              |                                                             | 3         | 13,823,998                      | 96%      |
|              | <b>Week 1</b><br>DMSO control                               | 1         | 12,165,140                      | 97%      |
|              |                                                             | 2         | 11,748,157                      | 96%      |
|              |                                                             | 3         | 12,558,375                      | 97%      |
|              | <b>Week 3</b><br>U0126                                      | 1         | 12,765,004                      | 93%      |
|              |                                                             | 2         | 11,862,249                      | 97%      |
|              |                                                             | 3         | 13,849,488                      | 95%      |
|              | <b>Week 3</b><br>DMSO control                               | 1         | 13,018,137                      | 94%      |
|              |                                                             | 2         | 12,150,097                      | 93%      |
|              |                                                             | 3         | 12,601,300                      | 96%      |
