# Supplementary material for: SHP2 Regulates Chondrocyte Terminal Differentiation, Growth Plate Architecture and Skeletal Cell Fates
Source: PubMed Central journal article supplement (PMC4038465; doi:10.1371/journal.pgen.1004364), 2014-05-29
Supplement: pgen.1004364.s016.pdf [file pgen.1004364.s016.pdf]

| Growth plate zone | Transcript      | Reference |
|-------------------|-----------------|-----------|
| <b>PZ</b>         | <i>Col2a1</i>   | [56]      |
|                   | <i>Col9a1</i>   | [56]      |
|                   | <i>Col9a2</i>   | [56]      |
|                   | <i>Col9a3</i>   | [56]      |
|                   | <i>Col11a1</i>  | [56]      |
|                   | <i>Col11a2</i>  | [56]      |
|                   | <i>Sox9</i>     | [38]      |
|                   | <i>Fgfr3</i>    | [57]      |
| <b>Pre-HZ</b>     | <i>Pth1r</i>    | [58]      |
|                   | <i>Ihh</i>      | [58]      |
|                   | <i>Panx3</i>    | [59]      |
|                   | <i>Sp7</i>      | [60]      |
| <b>Early-HZ</b>   | <i>Col10a1</i>  | [38]      |
|                   | <i>Phospho1</i> | [61]      |
|                   | <i>Bmp6</i>     | [62]      |
|                   | <i>Alpl</i>     | [63]      |
| <b>Late-HZ</b>    | <i>Spp1</i>     | [38]      |
|                   | <i>Mmp13</i>    | [38]      |
|                   | <i>Hpse</i>     | [64]      |
|                   | <i>Adamts5</i>  | [65]      |
|                   | <i>Adamts1</i>  | [66]      |
|                   | <i>Tnfsf11</i>  | [67]      |
|                   | <i>Ibsp</i>     | [68]      |

#### Additional References

56. Keene DR, Oxford JT, Morris NP (1995) Ultrastructural localization of collagen types II, IX, and XI in the growth plate of human rib and fetal bovine epiphyseal cartilage: type XI collagen is restricted to thin fibrils. *Journal of Histochemistry & Cytochemistry* 43: 967–979. doi:10.1177/43.10.7560887.
57. Naski MC, Colvin JS, Coffin JD, Ornitz DM (1998) Repression of hedgehog signaling and BMP4 expression in growth plate cartilage by fibroblast growth factor receptor 3. *Development* 125: 4977–4988.
58. Shung C-Y, Ota S, Zhou Z-Q, Keene DR, Hurlin PJ (2012) Disruption of a Sox9-  $\beta$ -catenin circuit by mutant Fgfr3 in thanatophoric dysplasia type II. *Human Molecular Genetics* 21: 4628–4644. doi:10.1093/hmg/ddc305.
59. Iwamoto T, Nakamura T, Doyle A, Ishikawa M, de Vega S, et al. (2010) Pannexin 3 Regulates Intracellular ATP/cAMP Levels and Promotes Chondrocyte Differentiation. *Journal of Biological Chemistry* 285: 18948–18958. doi:10.1074/jbc.M110.127027.
60. Nishimura R, Wakabayashi M, Hata K, Matsubara T, Honma S, et al. (2012) Osterix Regulates Calcification and Degradation of Chondrogenic Matrices through Matrix Metalloproteinase 13 (MMP13) Expression in Association with Transcription Factor Runx2 during Endochondral Ossification. *Journal of Biological Chemistry* 287: 33179–33190. doi:10.1074/jbc.M111.337063.

61. Houston B, Stewart AJ, Farquharson C (2004) PHOSPHO1-A novel phosphatase specifically expressed at sites of mineralisation in bone and cartilage. *Bone* 34: 629–637. doi:10.1016/j.bone.2003.12.023.
62. Vu TH, Shipley JM, Bergers G, Berger JE, Helms JA, et al. (1998) MMP-9/gelatinase B is a key regulator of growth plate angiogenesis and apoptosis of hypertrophic chondrocytes. *Cell* 93: 411–422.
63. Hu H (2004) Sequential roles of Hedgehog and Wnt signaling in osteoblast development. *Development* 132: 49–60. doi:10.1242/dev.01564.
64. Brown AJ, Alicknavitch M, D'Souza SS, Daikoku T, Kirn-Safran CB, et al. (2008) Heparanase expression and activity influences chondrogenic and osteogenic processes during endochondral bone formation. *Bone* 43: 689–699. doi:10.1016/j.bone.2008.05.022.
65. Makihira S (2003) Thyroid Hormone Enhances Aggrecanase-2/ADAM-TS5 Expression and Proteoglycan Degradation in Growth Plate Cartilage. *Endocrinology* 144: 2480–2488. doi:10.1210/en.2002-220746.
66. Little CB, Mittaz L, Belluoccio D, Rogerson FM, Campbell IK, et al. (2005) ADAMTS-1-knockout mice do not exhibit abnormalities in aggrecan turnover in vitro or in vivo. *Arthritis Rheum* 52: 1461–1472. doi:10.1002/art.21022.
67. Silvestrini G, Ballanti P, Patacchioli F, Leopizzi M, Gualtieri N, et al. (2005) Detection of osteoprotegerin (OPG) and its ligand (RANKL) mRNA and protein in femur and tibia of the rat. *J Mol Histol* 36: 59–67. doi:10.1007/s10735-004-3839-1.
68. Chen J, Shapiro HS, Sodek J (2009) Developmental expression of bone sialoprotein mRNA in rat mineralized connective tissues. *Journal of Bone and Mineral Research* 7: 987–997. doi:10.1002/jbmr.5650070816.
