# Supplementary material for: SHP2 Regulates Chondrocyte Terminal Differentiation, Growth Plate Architecture and Skeletal Cell Fates
Source: PubMed Central journal article supplement (PMC4038465; doi:10.1371/journal.pgen.1004364), 2014-05-29
Supplement: pgen.1004364.s017.pdf [file pgen.1004364.s017.pdf]

| GP zone         | Gene            | MEK1/2 inhibition |         | SHP2 depletion |         | 4-OHT treatment |         |
|-----------------|-----------------|-------------------|---------|----------------|---------|-----------------|---------|
|                 |                 | FC*               | P value | FC*            | P value | FC*             | P value |
| <b>PZ</b>       | <i>Sox9</i>     | 2.05              | 2.4E-03 | 1.36           | 7.7E-01 | 1.13            | 1.0E+00 |
|                 | <i>Col9a1</i>   | 1.76              | 3.3E-02 | 1.46           | 5.2E-01 | 0.99            | 1.0E+00 |
|                 | <i>Fgfr3</i>    | 2.74              | 1.4E-05 | 2.35           | 7.7E-03 | 0.82            | 1.0E+00 |
|                 | <i>Acan</i>     | 2.43              | 1.4E-04 | 1.32           | 7.7E-01 | 1.06            | 1.0E+00 |
| <b>Pre-HZ</b>   | <i>Pth1r</i>    | 2.08              | 5.0E-03 | 2.61           | 1.5E-03 | 0.82            | 1.0E+00 |
|                 | <i>Ihh</i>      | 3.92              | 3.1E-09 | 6.27           | 7.6E-11 | 0.71            | 4.5E-01 |
|                 | <i>Panx3</i>    | 3.42              | 1.6E-08 | 5.05           | 5.5E-09 | 0.77            | 7.0E-01 |
|                 | <i>Sp7</i>      | 2.04              | 4.4E-03 | 1.65           | 2.5E-01 | 0.92            | 1.0E+00 |
| <b>Early-HZ</b> | <i>Col10a1</i>  | 1.69              | 5.3E-02 | 1.66           | 2.5E-01 | 0.67            | 1.3E-01 |
|                 | <i>Phospho1</i> | 2.85              | 8.3E-06 | 2.35           | 8.5E-03 | 0.93            | 1.0E+00 |
|                 | <i>Bmp6</i>     | 2.41              | 2.4E-04 | 2.06           | 4.1E-02 | 0.79            | 1.0E+00 |
|                 | <i>Alpl</i>     | 1.88              | 1.9E-02 | 2.88           | 3.2E-04 | 0.86            | 1.0E+00 |
| <b>Late-HZ</b>  | <i>Adamts1</i>  | 0.71              | 3.5E-01 | 0.43           | 1.6E-02 | 1.28            | 8.8E-01 |
|                 | <i>Adamts5</i>  | 0.30              | 1.1E-07 | 0.47           | 2.9E-02 | 1.10            | 1.0E+00 |
|                 | <i>Spp1</i>     | 0.13              | 1.5E-22 | 0.88           | 1.0E+00 | 0.72            | 3.4E-01 |
|                 | <i>Hpse</i>     | 0.34              | 1.8E-06 | 0.39           | 4.5E-03 | 0.43            | 2.9E-06 |

\* FC = Fold change when comparing treated pellets to control pellets at w3
