# Supplementary material for: SHP2 Regulates Chondrocyte Terminal Differentiation, Growth Plate Architecture and Skeletal Cell Fates
Source: PubMed Central journal article supplement (PMC4038465; doi:10.1371/journal.pgen.1004364), 2014-05-29
Supplement: pgen.1004364.s018.pdf [file pgen.1004364.s018.pdf]

| <b>Transcription factor</b> | <b>Role in the growth plate</b>                           | <b>Reference</b> |
|-----------------------------|-----------------------------------------------------------|------------------|
| Mef2c                       |                                                           | [69]             |
| Tcf7                        | Promotes hypertrophy                                      | [70]             |
| Dlx5                        |                                                           | [41]             |
| Msx2                        |                                                           | [40]             |
| Foxp1                       | Inhibits hypertrophy                                      | [71]             |
| Hey1                        |                                                           | [39]             |
| Sox9                        | Inhibits terminal differentiation or cartilage resorption | [38]             |
| Dlx5                        |                                                           | [41]             |
| Msx2                        |                                                           | [40]             |
| Rbpj                        | Promotes terminal differentiation or cartilage resorption | [72]             |

### **Additional References**

69. Arnold MA, Kim Y, Czubryt MP, Phan D, McAnally J, et al. (2007) MEF2C transcription factor controls chondrocyte hypertrophy and bone development. *Dev Cell* 12: 377–389. doi:10.1016/j.devcel.2007.02.004.
70. Mikasa M, Rokutanda S, Komori H, Ito K, Tsang YS, et al. (2010) Regulation of Tcf7 by Runx2 in chondrocyte maturation and proliferation. *Journal of Bone and Mineral Metabolism* 29: 291–299. doi:10.1007/s00774-010-0222-z.
71. Guo X, Zhao H (2012) Foxp1/2/4, New Transcriptional Regulators for the Chondrocyte Hypertrophy and Osteoblast Differentiation during Skeletal Ossification Minneapolis.
72. Kohn A, Dong Y, Miranda AJ, Jesse AM, Honjo T, et al. (2012) Cartilage-specific RBPj -dependent and -independent Notch signals regulate cartilage and bone development. *Development* 139: 1198–1212. doi:10.1242/dev.070649.
