# Supplementary material for: SHP2 Regulates Chondrocyte Terminal Differentiation, Growth Plate Architecture and Skeletal Cell Fates
Source: PubMed Central journal article supplement (PMC4038465; doi:10.1371/journal.pgen.1004364), 2014-05-29
Supplement: pgen.1004364.s020.pdf [file pgen.1004364.s020.pdf]

| <b>Transcript</b> | <b>Forward Primer</b> | <b>Reverse Primer</b> |
|-------------------|-----------------------|-----------------------|
| <i>Col9a3</i>     | AGGTACACCTTGAGGCCCTT  | TCCCACTGGGGAAGTAGGAG  |
| <i>Ihh</i>        | TCAAGGACGAGGAGAACACG  | GAGTGATGGCCATCTTCATCC |
| <i>Phospho1</i>   | CTGTTGGTCTCCAGCTGTCA  | GCAGAAGCACATCATCCACA  |
| <i>Spp1</i>       | TGGCTATAGGATCTGGGTGC  | TTGGCAGTGATTTGCTTTTG  |
| <i>Adamts5</i>    | GTGTCACATGAATGATGCC   | CGACCCTCAAGAACTTTTGC  |
| <i>Hmga2</i>      | TCTCCTGAGCAGGCTTCTTC  | AAGGCAGCAAAAACAAGAGC  |
| <i>Egr1</i>       | GAGTCGTTTGGCTGGGATAA  | CCTTCAATCCTCAAGGGGAG  |
| <i>Fosl1</i>      | CTCTTCCTCCTCTGGGCTG   | TGGCCTATCCCAGTACAGT   |
| <i>Actb</i>       | CAGCTTCTTTGCAGCTCCTT  | AGGAGTCCTTCTGACCCATTC |
